# Supplementary material for: Universal non-Debye low-frequency vibrations in sheared amorphous solids
Source: Royal Society of Chemistry journal article supplement (doi:10.1039/d2sm00218c), 2022-01-01
Supplement: d2sm00218c1.pdf [file d2sm00218c1.pdf]

## Supplemental Material for “Universal non-Debye low-frequency vibrations in sheared amorphous solids”

Vishnu V. Krishnan,<sup>\*</sup> Kabir Ramola,<sup>†</sup> and Smarajit Karmakar<sup>‡</sup>  
*Centre for Interdisciplinary Sciences, Tata Institute of Fundamental Research, Hyderabad 500046, India*  
(Dated: April 9, 2022)

In this document, we provide additional figures and details related to the results presented in the main text.

### CONTENTS

- Sec. **A**: The frequency distribution of the strains needed to achieve shear-stabilization.
- Sec. **B**: Per-bond stresses across the three types of configurations.
- Sec. **C**: Minimum eigenvalue distributions of large system sizes.
- Sec. **D**: Minimum eigenvalue distributions upon approaching a plastic-event.

---

<sup>\*</sup> [vishnuvk@tifrh.res.in](mailto:vishnuvk@tifrh.res.in)

<sup>†</sup> [kramola@tifrh.res.in](mailto:kramola@tifrh.res.in)

<sup>‡</sup> [smarajit@tifrh.res.in](mailto:smarajit@tifrh.res.in)

## A. Strain required to achieve Shear-stabilization

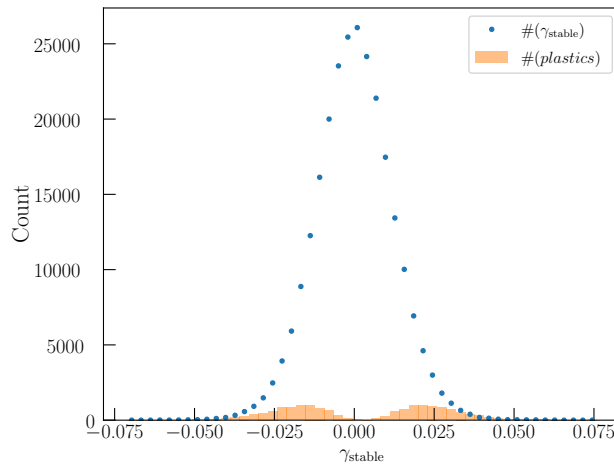

FIG. S1. Frequency distribution of strains required to attain shear-stability, in the *Zero-shear-stress* protocol, in systems of size  $N = 256$ . The orange bars indicate the number of plastic events encountered by samples that undergo strains in the corresponding intervals. They account for  $\sim 6.2\%$  of all samples. In the *Zero-shear-stress* protocol, we encounter plastic events during AQS. Here we show that the proportion of straining trajectories that encounter them, while small, is not insignificant.

## B. Internal Bond-Stresses

### 1. Distributions

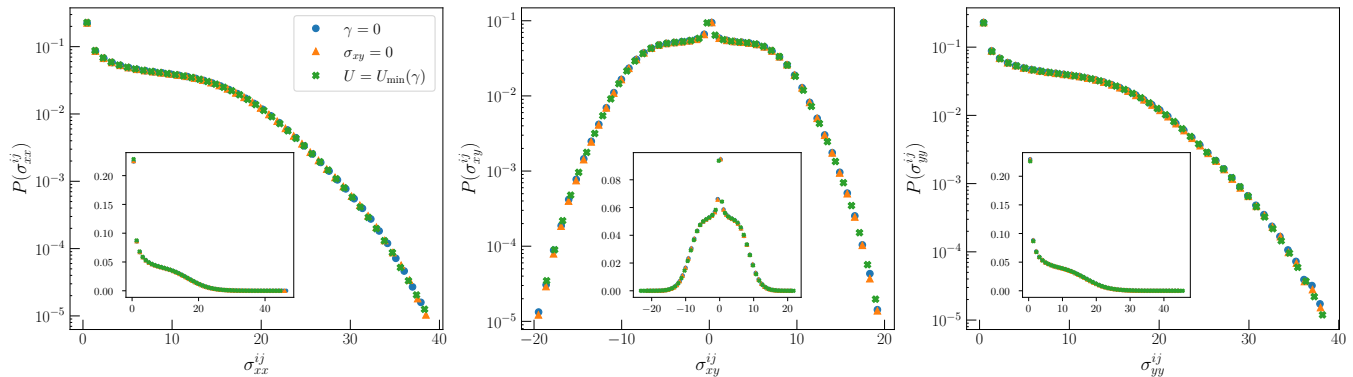

FIG. S2. Distributions of bond-stresses, from configurations of systems of size  $N = 256$ . The *Unstrained*, *Zero-shear-stress* and *Shear-strain-energy-minimized* configurations all exhibit *identical* distributions.

### 2. Visualization

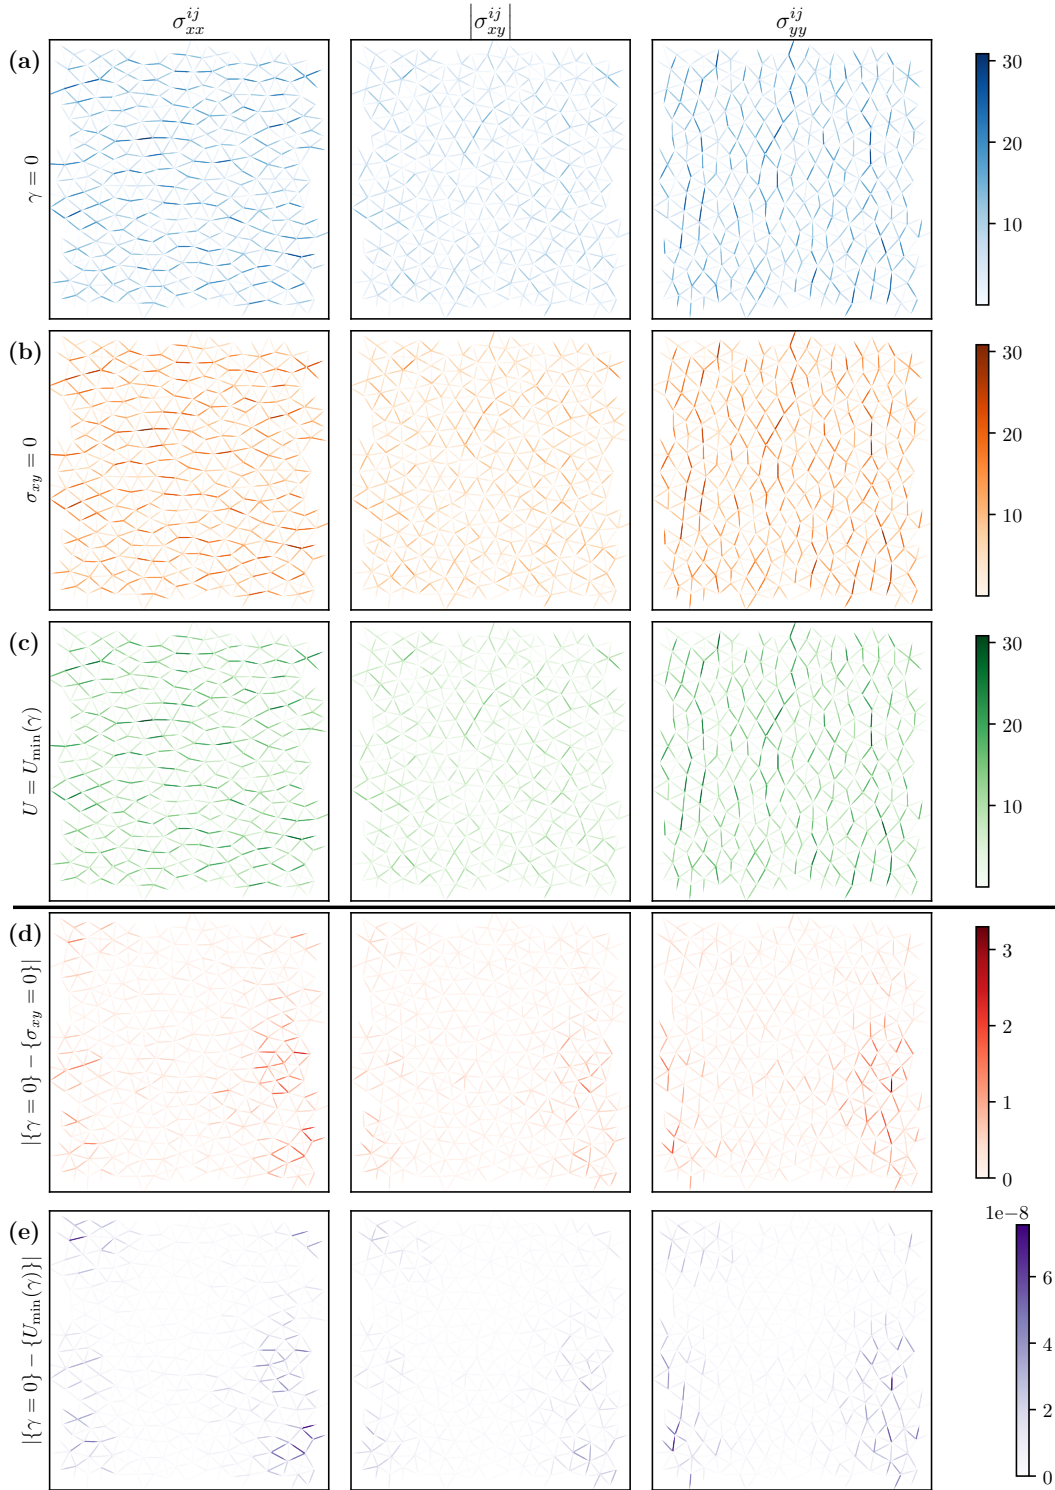

FIG. S3. Components of the stress tensor at each 'bond' in a two-dimensional configuration of a system of size  $N = 256$ . **(a)** an unstrained configuration, **(b)** The same configuration strained to achieve zero-shear-stress. **(c)** The same configuration as in **(a)**, energy minimized with a strain degree of freedom. **(d)** The difference in bond stresses between the *Unstrained* and *Zero-shear-stress* configurations is an order of magnitude smaller than the original stress. **(e)** The difference in bond stresses between the *Zero-shear-stress* and *Shear-strain-energy-minimized* configurations is zero up to numerical precision.

### C. Large Systems

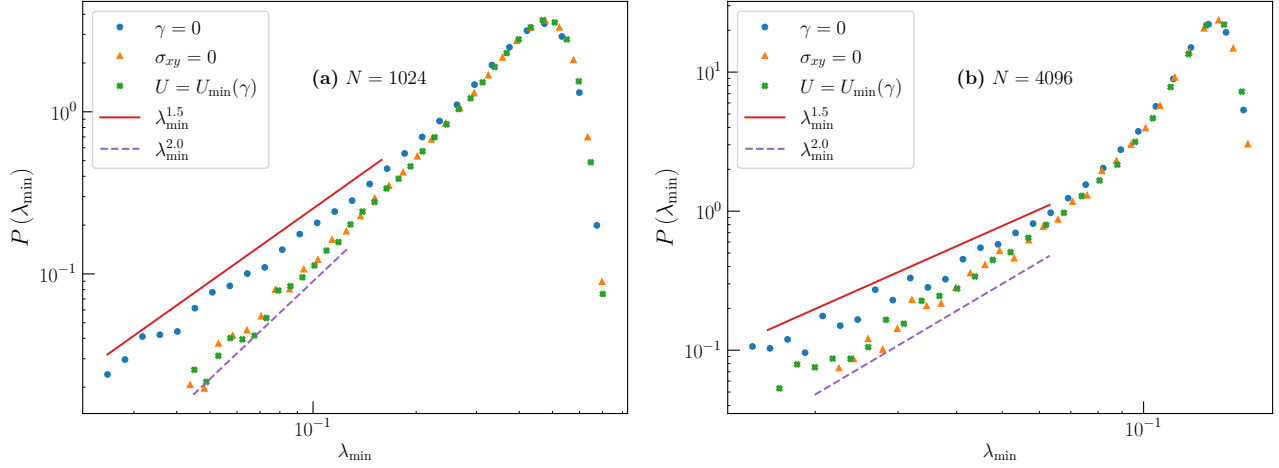

FIG. S4. Minimum eigenvalue distributions of the *Unstrained* and shear-stabilized configurations in 2D, corresponding to larger system sizes: (a)  $N = 1024$  and (b)  $4096$ . The lines indicate pure power-laws. The deviation from  $\omega_{\min}^4$  persists as larger system sizes are probed, and is not diminished with the reduced stress fluctuations shown in Fig. 1 of the main text.

### D. Approach to Universal Distribution

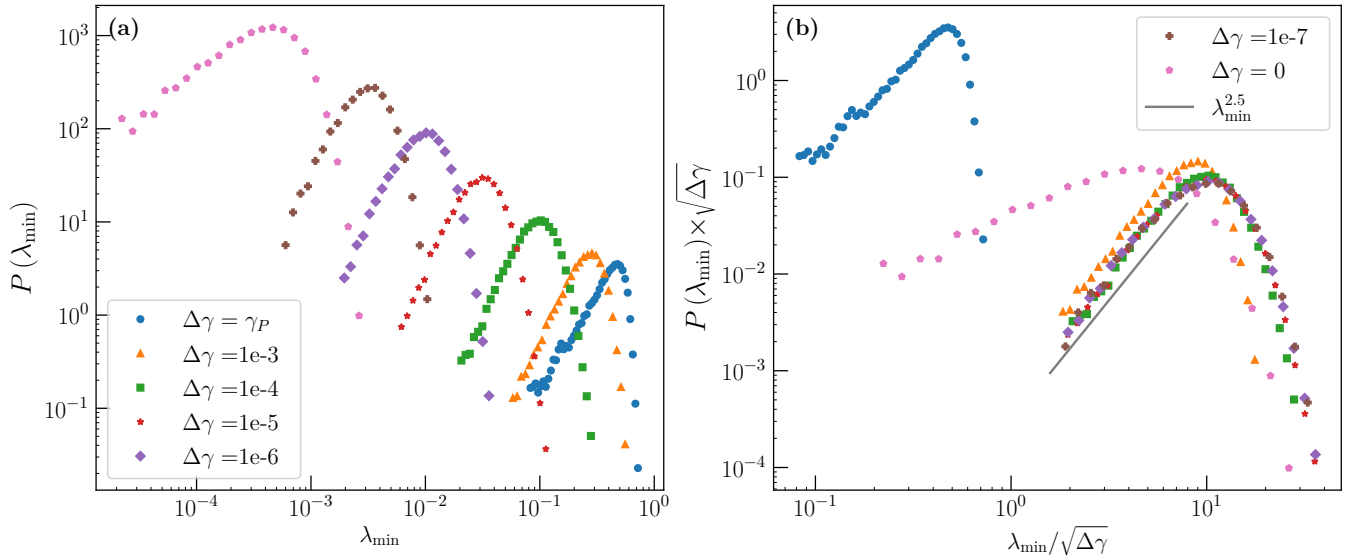

FIG. S5. Minimum eigenvalue distributions of a system of size  $N = 1024$ , upon approaching a plastic event. The (blue) circles display the distribution of eigenvalues in the initial, unstrained state. The (pink) hexagons are distributions of eigenvalues measured at closest approach to the plastic strain  $\gamma_P$ . The other distributions belong to configurations at specific strains away from  $\gamma_P$ .
